# Supplementary material
Source: PubMed Central journal article supplement (PMC4333058)

## Figure S2 Prior to UV challenge

## Immediately after UV challenge

## 4 days Post-UV challenge

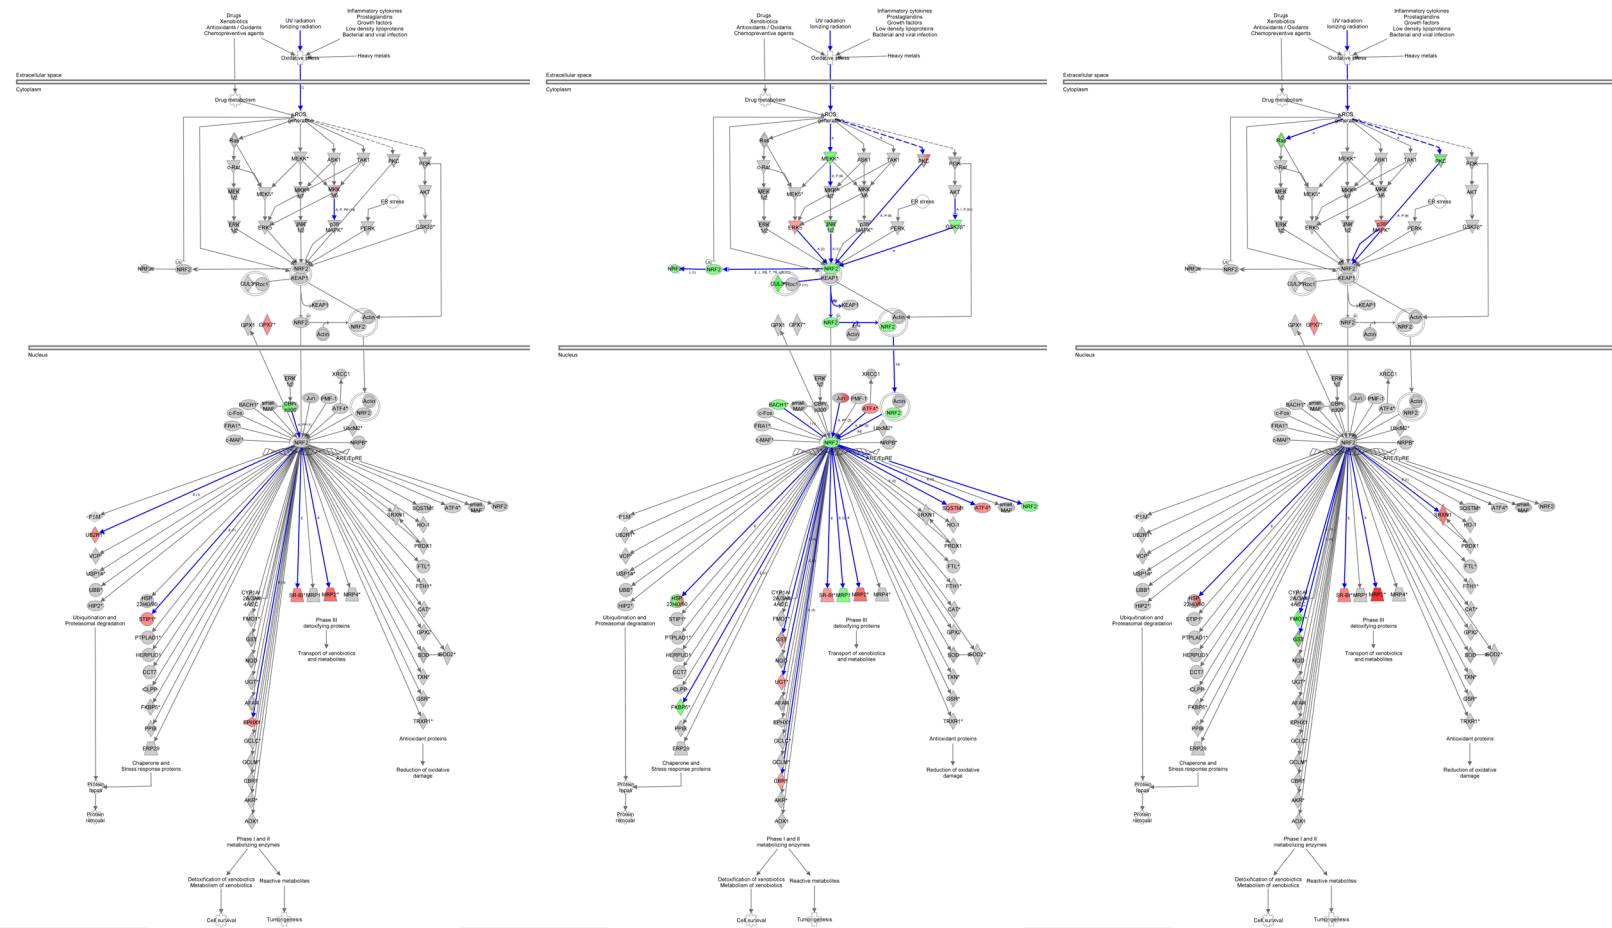

Supplement: NIHMS644417-supplement-Supp_FigureS2.pdf [file NIHMS644417-supplement-Supp_FigureS2.pdf]
